# Supplementary material for: Local Long-Term Inner Ear Drug Delivery in Normal Hearing Guinea Pig—An Animal Model to Develop Preventive Treatment for Noise-Induced Hearing Loss
Source: MDPI journal article supplement (doi:10.3390/biom12101427), 2022-10-05
Supplement: s1 [file s1]

# “Local Long-term Inner Ear Drug Delivery in Normal Hearing Guinea Pig – an Animal Model to develop preventive treatment for noise-induced hearing loss”

Kathrin Malfeld, Peter Baumhoff, Holger A. Volk, Thomas Lenarz and Verena Scheper

## Supplement S1: detailed information on the statistical tests performed

### Figure 6A

all: paired t-test

### Figure 6B

all: paired t-test

### Figure 7

all: paired t-test

### Figure 8A

| comparison | test used                 |
|------------|---------------------------|
| click      | paired t-test             |
| 0.5 kHz    | Wilcoxon signed-rank test |
| 1 kHz      | Wilcoxon signed-rank test |
| 2 kHz      | Wilcoxon signed-rank test |
| 4 kHz      | paired t-test             |
| 8 kHz      | paired t-test             |
| 16 kHz     | Wilcoxon signed-rank test |
| 32 kHz     | paired t-test             |
| 40 kHz     | Wilcoxon signed-rank test |

### Figure 8B

| comparison | test used                 |
|------------|---------------------------|
| click      | paired t-test             |
| 0.5 kHz    | Wilcoxon signed-rank test |
| 1 kHz      | Wilcoxon signed-rank test |
| 2 kHz      | Wilcoxon signed-rank test |
| 4 kHz      | paired t-test             |
| 8 kHz      | paired t-test             |
| 16 kHz     | paired t-test             |
| 32 kHz     | Wilcoxon signed-rank test |
| 40 kHz     | paired t-test             |

**Figure 8C**

| <b>comparison</b> | <b>test used</b>          |
|-------------------|---------------------------|
| click             | paired t-test             |
| 0.5 kHz           | Wilcoxon signed-rank test |
| 1 kHz             | Wilcoxon signed-rank test |
| 2 kHz             | Wilcoxon signed-rank test |
| 4 kHz             | paired t-test             |
| 8 kHz             | paired t-test             |
| 16 kHz            | Wilcoxon signed-rank test |
| 32 kHz            | Wilcoxon signed-rank test |
| 40 kHz            | Wilcoxon signed-rank test |

**Figure 9**

- **d0 pre noise vs. d0 post noise**

| <b>comparison</b> | <b>test used</b>          |
|-------------------|---------------------------|
| 0.5 kHz           | Wilcoxon signed-rank test |
| 1 kHz             | Wilcoxon signed-rank test |
| 2 kHz             | Wilcoxon signed-rank test |
| 4 kHz             | paired t-test             |
| 8 kHz             | paired t-test             |
| 16 kHz            | paired t-test             |
| 32 kHz            | Wilcoxon signed-rank test |
| 40 kHz            | Wilcoxon signed-rank test |

- **d0 post noise vs. d7**

| <b>comparison</b> | <b>test used</b>          |
|-------------------|---------------------------|
| 0.5 kHz           | paired t-test             |
| 1 kHz             | paired t-test             |
| 2 kHz             | paired t-test             |
| 4 kHz             | paired t-test             |
| 8 kHz             | paired t-test             |
| 16 kHz            | paired t-test             |
| 32 kHz            | paired t-test             |
| 40 kHz            | Wilcoxon signed-rank test |

- **d0 pre noise vs. d7**

| <b>comparison</b> | <b>test used</b>          |
|-------------------|---------------------------|
| 0.5 kHz           | Wilcoxon signed-rank test |
| 1 kHz             | Wilcoxon signed-rank test |
| 2 kHz             | Wilcoxon signed-rank test |
| 4 kHz             | paired t-test             |
| 8 kHz             | paired t-test             |
| 16 kHz            | paired t-test             |
| 32 kHz            | Wilcoxon signed-rank test |
| 40 kHz            | paired t-test             |

**Figure 11**

| <b>comparison</b> | <b>test used</b>          |
|-------------------|---------------------------|
| click             | paired t-test             |
| 0.5 kHz           | paired t-test             |
| 1 kHz             | paired t-test             |
| 2 kHz             | Wilcoxon signed-rank test |
| 4 kHz             | paired t-test             |
| 8 kHz             | paired t-test             |
| 16 kHz            | Wilcoxon signed-rank test |
| 32 kHz            | paired t-test             |
| 40 kHz            | Wilcoxon signed-rank test |

**Figure 12A**

| <b>comparison</b> | <b>test used</b>          |
|-------------------|---------------------------|
| click             | paired t-test             |
| 0.5 kHz           | paired t-test             |
| 1 kHz             | Wilcoxon signed-rank test |
| 2 kHz             | paired t-test             |
| 4 kHz             | paired t-test             |
| 8 kHz             | paired t-test             |
| 16 kHz            | paired t-test             |
| 32 kHz            | paired t-test             |
| 40 kHz            | paired t-test             |

**Figure 12B**

| <b>comparison</b> | <b>test used</b>          |
|-------------------|---------------------------|
| click             | paired t-test             |
| 0.5 kHz           | paired t-test             |
| 1 kHz             | paired t-test             |
| 2 kHz             | Wilcoxon signed-rank test |
| 4 kHz             | paired t-test             |
| 8 kHz             | paired t-test             |
| 16 kHz            | Wilcoxon signed-rank test |
| 32 kHz            | paired t-test             |
| 40 kHz            | paired t-test             |
